# Supplementary material for: Sex-specific role of body weight in mediating stress susceptibility through MeA Tac2-Nk3R signaling
Source: Research Square preprint supplement (doi:10.21203/rs.3.rs-7939628/v1), 2025-11-07
Supplement: Supplementary file 1 [file 4d3d7b41d7a6b57b5d8614ce.docx]

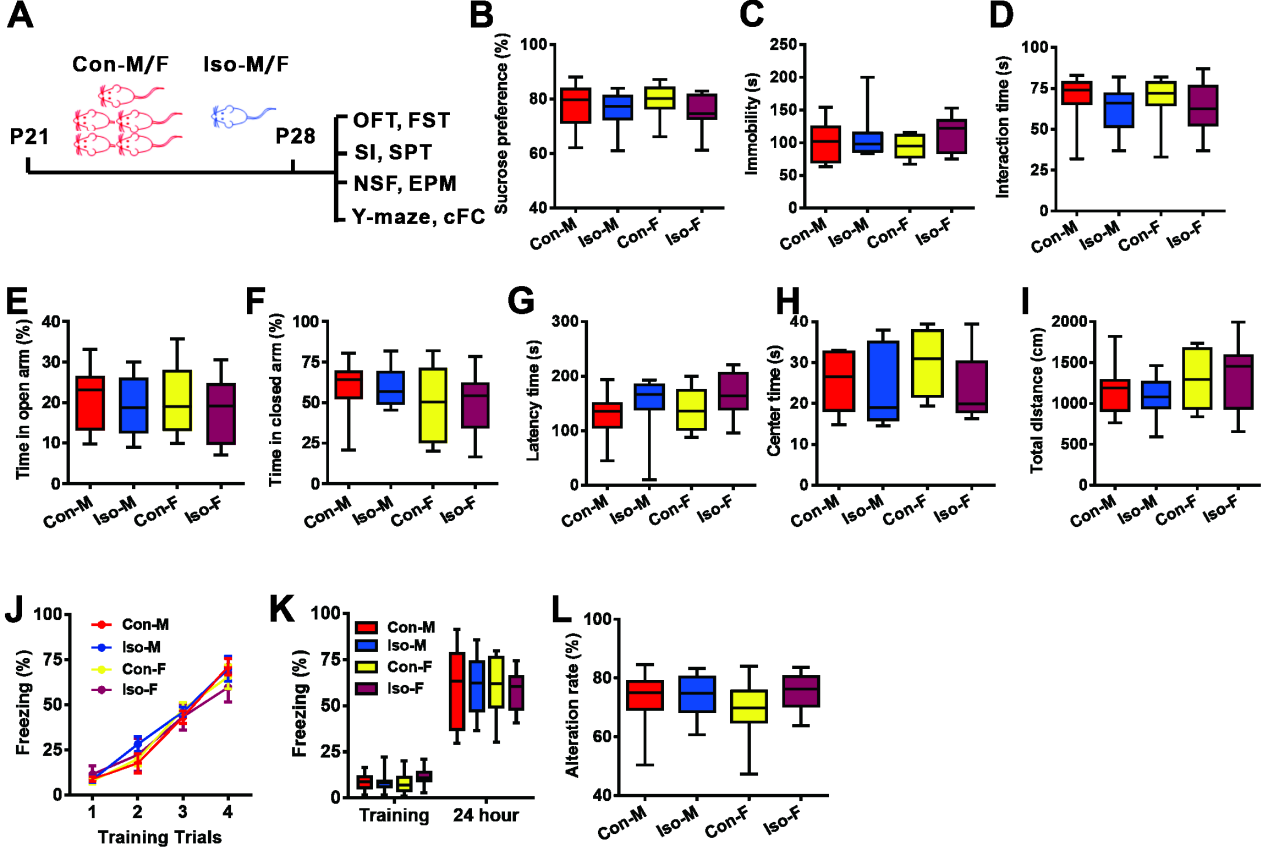


**Fig.S1. One-week social isolation does not induce depressive-like behaviors both in male and female mice.** (**A**) Schematic of the depressive- and anxiety-related behavior tests after social isolation during adolescence. (**B**) No difference was found in the sucrose preference in male and female mice suffering from one-week social isolation during adolescence (n=8-10 mice/group; two-way ANOVA; F(3, 32)=3.091, P=0.342). (**C**) One-week social isolation did not affect immobile time in the FST (n=8-10 mice/group; two-way ANOVA; F(3, 32)=2.568, P=0.513). (**D**) Social ability was not affected by one-week social isolation begun at P21 (n=8-10 mice/group; two-way ANOVA; F(3, 32)=3.003, P=0.267). (**E, F**) In the EPM test, isolated mice spent similar time in the open and closed arms compared with control mice (n=8-10 mice/group; two-way ANOVA; for E, F(3, 32)=2.625, P=0.502; for F, F(3, 32)=2.325, P=0.457). (**G**) In the NSF test, the latency to explore and bite the food was similar among groups (n=8-10 mice/group; two-way ANOVA; F(3, 32)=2.428, P=0.403). (**H, I**) One-week social isolation did not affect behavioral performance in the OFT (n=8-10 mice/group; two-way ANOVA; for H, F(3, 32)=2.547, P=0.635; for I, F(3, 32)=2.221, P=0.546). (**J-L**) The cognitive ability was not affected by one-week social isolation among groups (n=8-10 mice/group; two-way ANOVA; for K: F(3, 32)=2.417, P=0.402; for L: F(3, 32)=2.713, P=0.356). Data were presented as mean ± s.e.m.


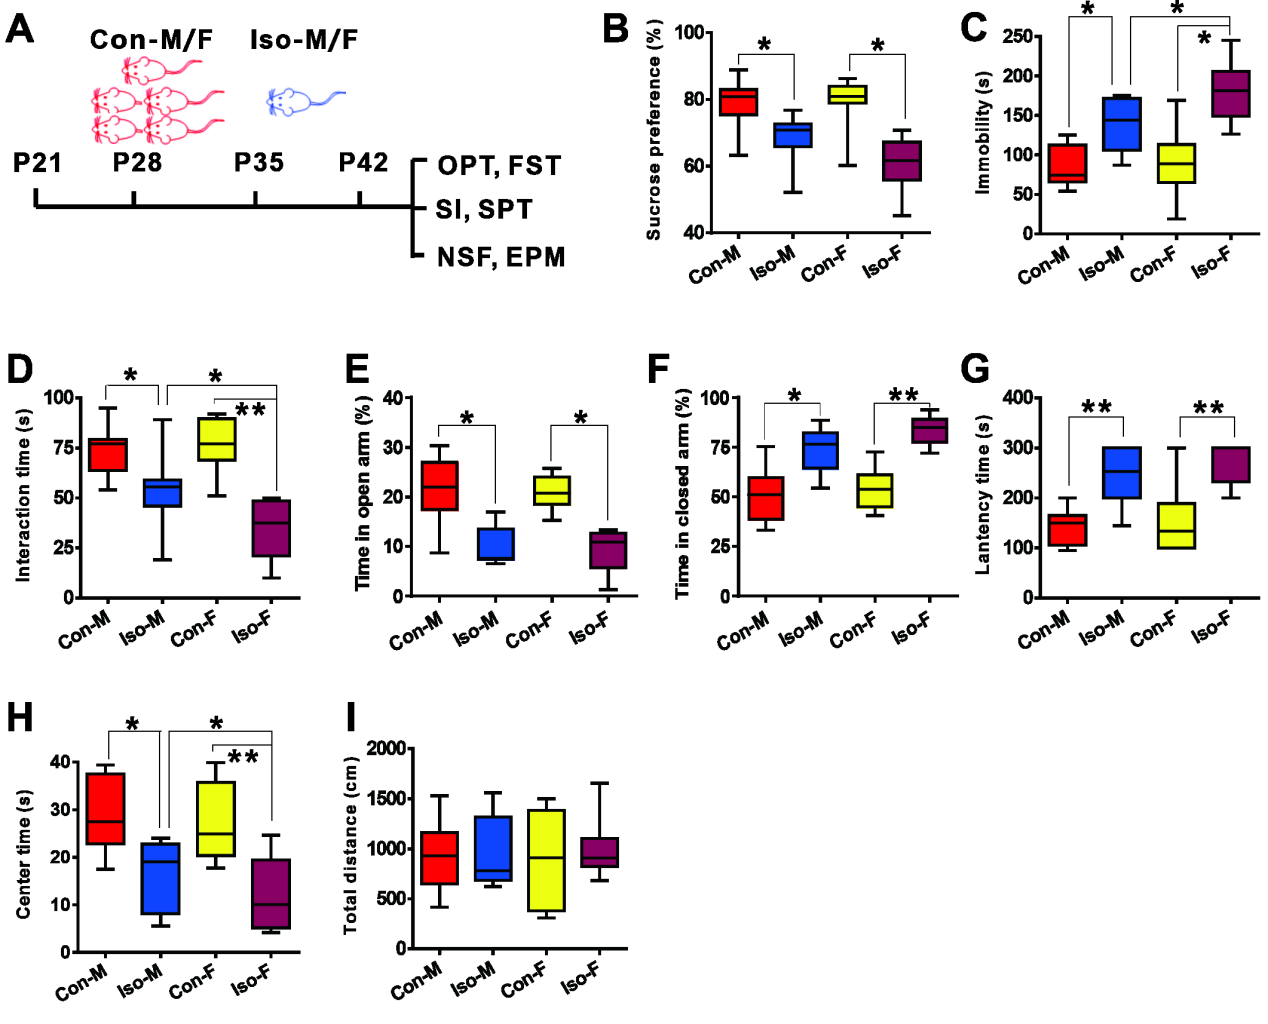


**Fig.S2. Three-week social isolation induces more seriously** **behavioral changes in female than male mice.** (**A**) Schematic of the depressive- and anxiety-related behavior tests after social isolation during adolescence. (**B**) Three-week social isolation caused decreased sucrose preference both in male and female mice (n=9-10 mice/group; two-way ANOVA; F(3, 33)=5.146, P=0.021). (**C**) Three-week social isolation induced more increased immobile time in female than male mice in the FST (n=9-10 mice/group; two-way ANOVA; F(3, 33)=5.735, P=0.019). (**D**) Social ability was more seriously disturbed by three-week social isolation begun at P21 in female than male mice (n=9-10 mice/group; two-way ANOVA; F(3, 33)=5.354, P=0.017). (**E-I**) Three-week social isolation induced more seriously anxiety-like behaviors in female than male mice (n=9-10 mice/group; two-way ANOVA; for E, F(3, 33)=4.674, P=0.024; for F, F(3, 33)=5.358, P=0.016; for G, F(3, 33)=5.008, P=0.028; for H, F(3, 33)=5.145, P=0.014; for I, F(3, 33)=2.035, P=0.462). Data were presented as mean ± s.e.m; *, P < 0.05, **, P<0.01.


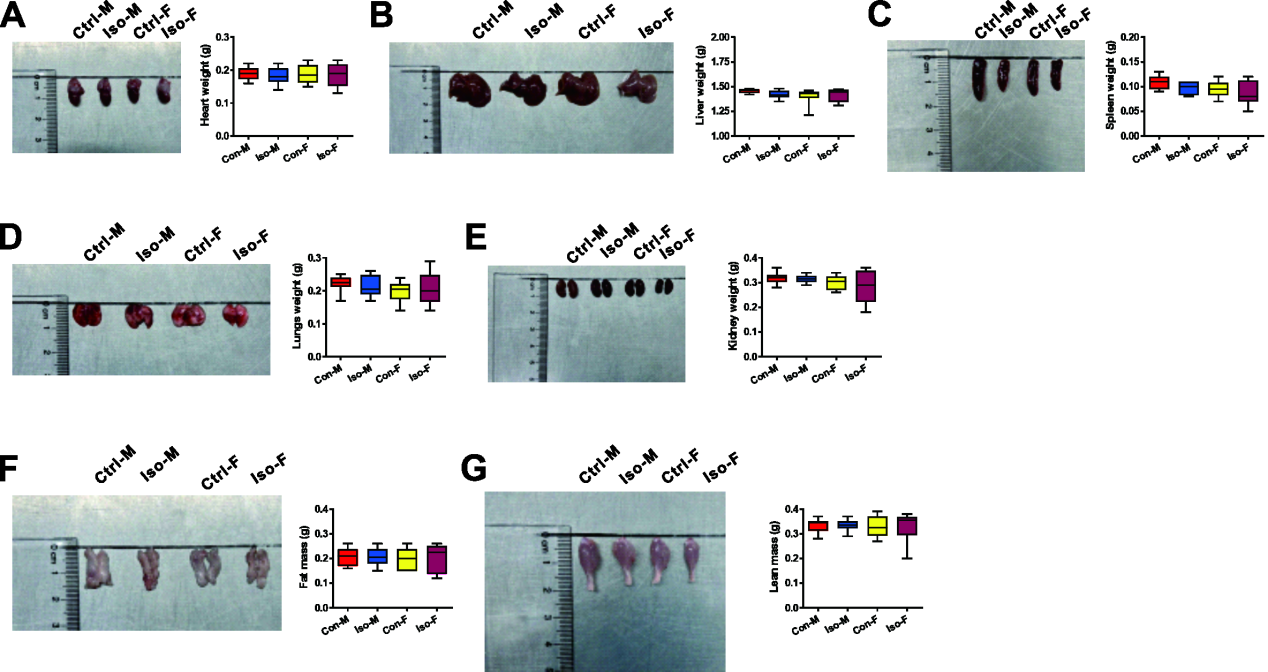


**Fig.S3. Two-week social isolation does not affect weight of the peripheral organs.** (**A-E**) Weight of the heart, liver, spleen, lung and kidney in mice subjected from social isolation treatment (n=10 mice/group; two-way ANOVA; for A: F(3, 36)=2.578, P=0.632; for B: F(3, 36)=1.879, P=0.725; for C: F(3, 36)=2.154, P=0.523; for D: F(3, 36)=2.008, P=0.556; for E: F(3, 36)=3.045, P=0.261). (**F, G**) Fat and lean mass in mice subjected from social isolation treatment (n=10 mice/group; two-way ANOVA; for F: F(3, 36)=2.235, P=0.532; for G: F(3, 36)=2.092, P=0.597). Data were presented as mean ± s.e.m.


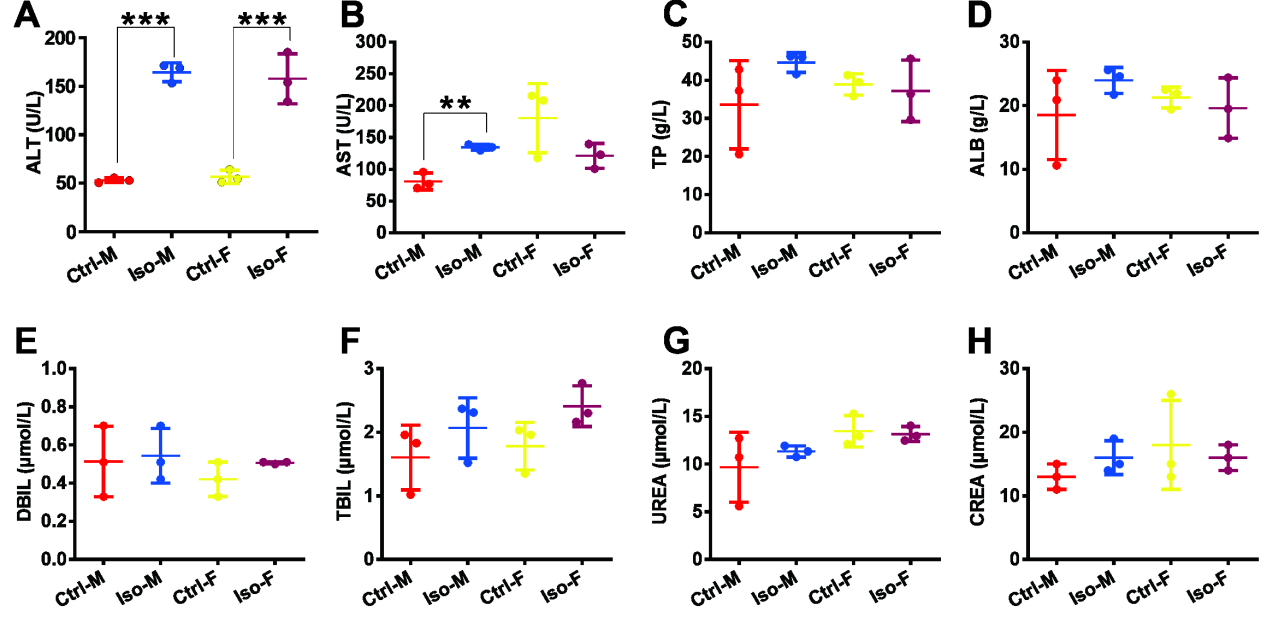


**Fig.S4. Serum levels of hepatic parameters after two-week social isolation.** (**A-H**) Social isolation stress increase ALT and AST levels without affecting the levels of others (n=3 mice/group; two-way ANOVA; for A: F(3, 9)=4.246, P=0.023; for B: F(3, 9)=2.985, P=0.049; for C: F(3, 9)=1.546, P=0.887; for D: F(3, 9)=2.564, P=0.465; for E: F(3, 9)=2.681, P=0.424; for F: F(3, 9)=2.556, P=0.446; for G: F(3, 9)=2.321, P=0.487; for H: F(3, 9)=2.347, P=0.536). Data were presented as mean ± s.e.m; **, P < 0.01, ***, P<0.001.


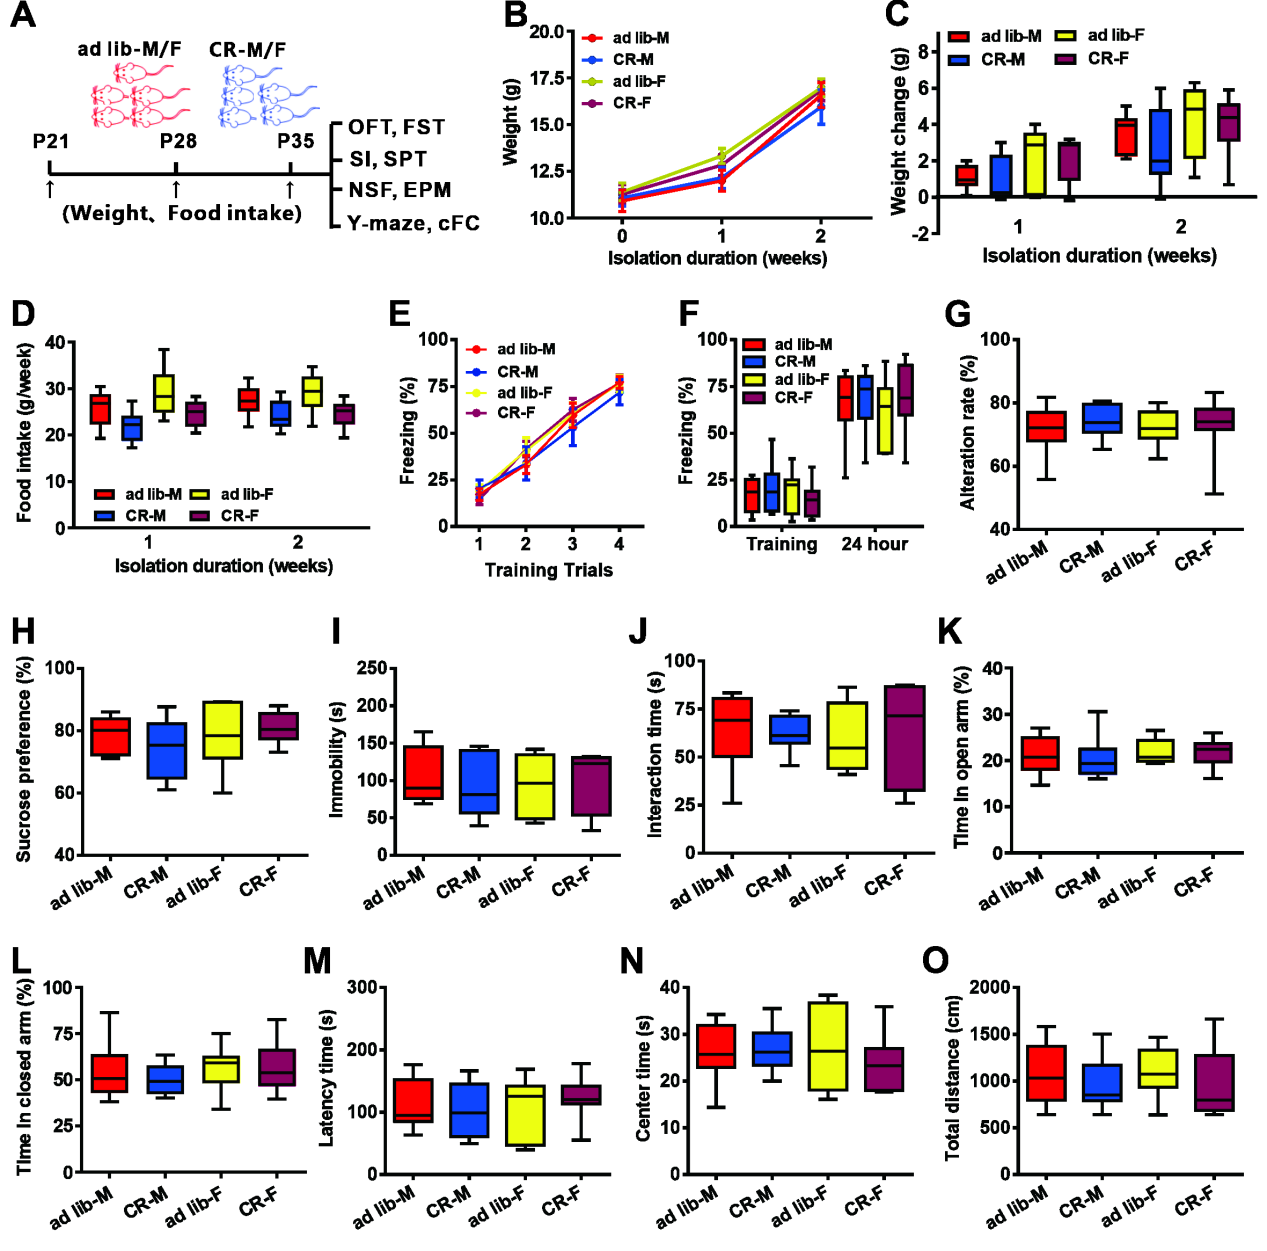


**Fig.S5. Two-week 10% CR does not affect body weight and depressive-like behaviors both in male and female mice.** (**A**) Schematic of the experiments. (**B**) Body weight of mice under calorie restriction paradigm (n=10 mice/group; repeated measures two-way ANOVA; F(3, 108)=4.873, P=0.481). (**C**) Calorie restricted both male and female mice exhibited no weight change (n=10 mice/group; repeated measures two-way ANOVA; F(3, 72)=4.814, P=0.411). (**D**) 10% calorie restriction treatment did not affect food intake (n=10 mice/group; repeated measures two-way ANOVA; F(3, 72)=5.384, P=0.128). (**E, F**) The freezing time was similar among groups (n=10 mice/group; two-way ANOVA; F(3, 36)=2.004, P=0.357). (**G**) Two-week calorie restricted mice showed normal alteration in the Y-maze (n=10 mice/group; two-way ANOVA; F(3, 36)=2.134, P=0.762). (**H-O**) Two-week 10% CR had no effects on depressive-like behaviors (n=10 mice/group; two-way ANOVA; for H: F(3, 36)=2.523, P=0.665; for I: F(3, 36)=2.478, P=0.623; for J: F(3, 36)=2.765, P=0.587; for K, F(3, 36)=1.686, P=0.724; for L, F(3, 36)=2.536, P=0.613; for M: F(3, 36)=2.458, P=0.478; for N, F(3, 36)=2.346, P=0.613; for O, F(3, 36)=2.342, P=0.576). Data were presented as mean ± s.e.m.


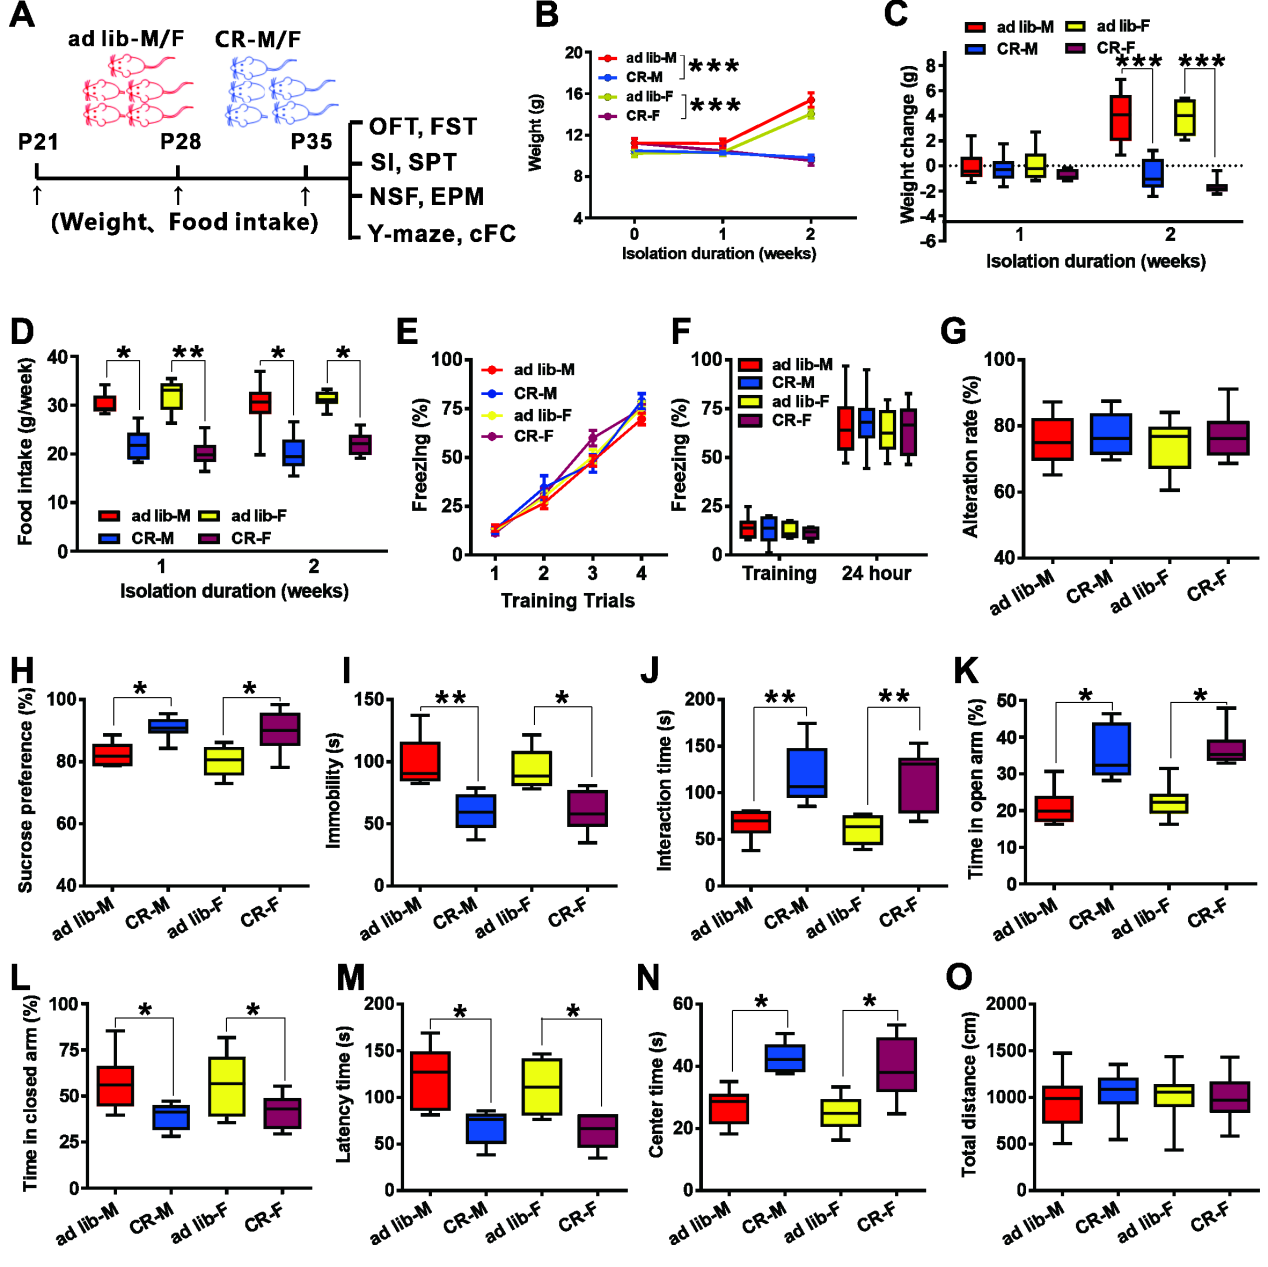


**Fig.S6. Two-week 40% CR leads to antidepressant effect both in female and male mice.** (**A**) Schematic of the experiments. (**B-D**) 40% calorie restriction treatment led to abnormal weight gain and decreased food intake (n=10 mice/group; repeated measures two-way ANOVA; for B: F(3, 108)=16.474, P=0.018; for C: F(3, 72)=12.814, P=0.032; for D: F(3, 72)=17.537, P=0.008). (**E-O**) Two-week 40% CR led to antidepressant effect (n=10 mice/group; two-way ANOVA; for F: F(3, 36)=2.176, P=0.425; for G: F(3, 36)=2.732, P=0.378; for H: F(3, 36)=5.368, P=0.048; for I: F(3, 36)=6.315, P=0.037; for J: F(3, 36)=6.658, P=0.026; for K, F(3, 36)=5.687, P=0.041; for L, F(3, 36)=6.576, P=0.027; for M: F(3, 36)=6.431, P=0.028; for N, F(3, 36)=5.215, P=0.043; for O, F(3, 36)=2.245, P=0.547). Data were presented as mean ± s.e.m; *, P<0.05, **, P < 0.01, ***, P<0.001.


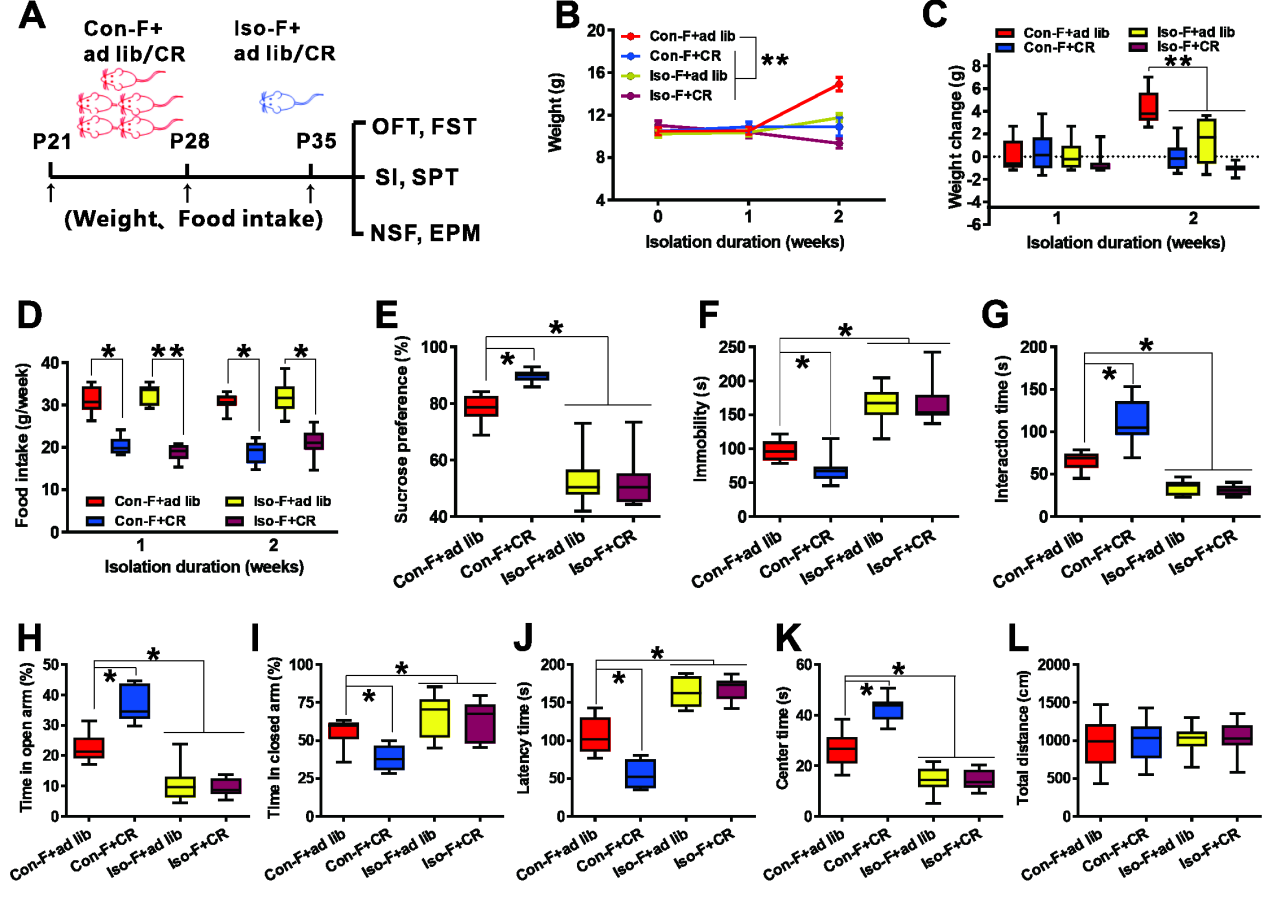


**Fig.S7. 40% CR does not improve depressive-like behaviors in two-week isolated female mice.** (**A**) Schematic of the experiments. (**B-D**) 40% calorie restriction treatment led to abnormal weight gain and decreased food intake (n=10 mice/group; repeated measures two-way ANOVA; for B: F(3, 108)=14.658, P=0.031; for C: F(3, 72)=14.265, P=0.027; for D: F(3, 72)=17.265, P=0.009). (**E-L**) 40% CR had no effects on two-week isolation-induced depressive-like behaviors in female mice (n=10 mice/group; two-way ANOVA; for E: F(3, 36)=6.854, P=0.024; for F: F(3, 36)=7.147, P=0.021; for G: F(3, 36)=7.587, P=0.019; for H: F(3, 36)=6.768, P=0.026; for I: F(3, 36)=6.315, P=0.039; for J: F(3, 36)=6.109, P=0.041; for K, F(3, 36)=6.984, P=0.023; for L, F(3, 36)=2.478, P=0.523). Data were presented as mean ± s.e.m; *, P<0.05, **, P < 0.01.


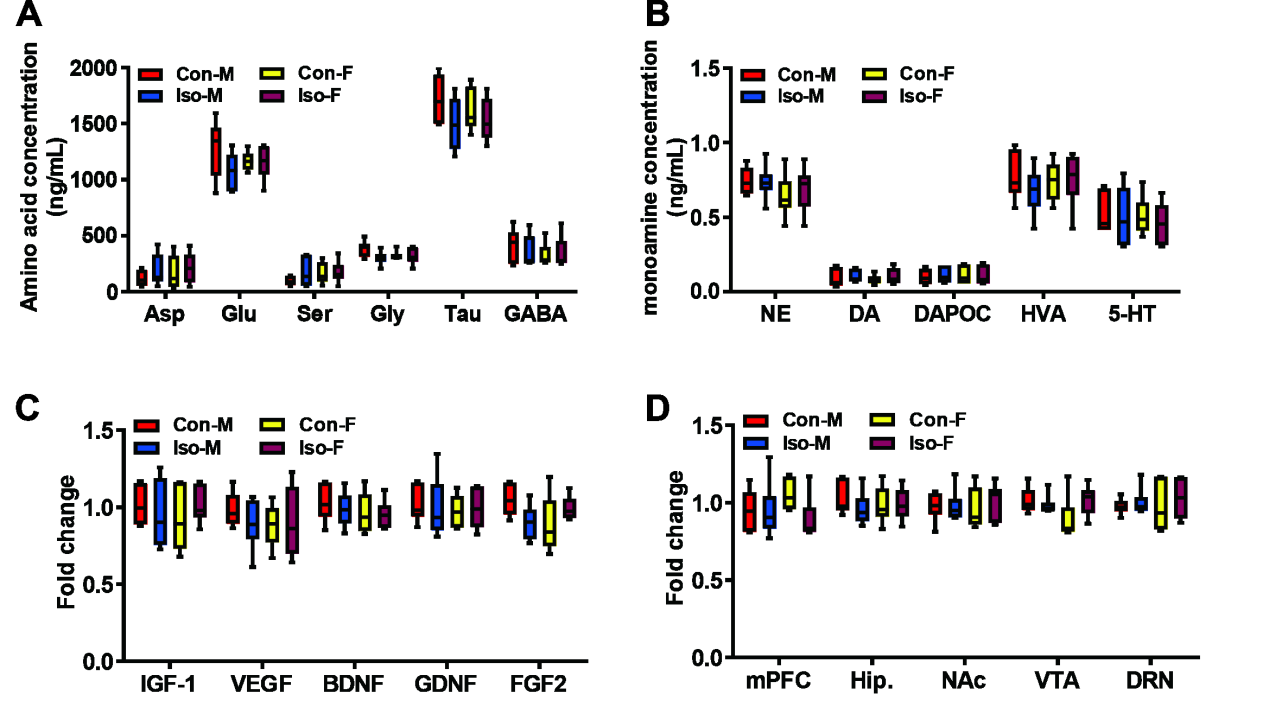


**Fig.S8. Two-week social isolation does not affect the level of amino acids, monoamines, trophic factors or Tac2 in other brain regions.** (**A**) Microdialysis measurements of amino acids concentration in the MeA region from control and socially isolated male and female mice (n = 6 mice/group; two-way ANOVA; Asp: aspartic acid, F(3, 20)=2.108, P=0.547; Glu: glutamate, F(3, 20)=2.367, P=0.487; Ser: serine, F(3, 20)=2.356, P=0.426; Gly: glycine, F(3, 20)=2.002, P=0.587; Tau: taurine, F(3, 20)=2.011, P=0.577; GABA: γ-aminobutyric acid, F(3, 20)=2.524, P=0.298). (**B**) Microdialysis measurements of monoamines concentration in the MeA region from control and socially isolated male and female mice (n = 6 mice/group; two-way ANOVA; NE: norepinephrine, F(3, 20)=2.034, P=0.568; DA: dopamine, F(3, 20)=1.347, P=0.745; DAPOC: 3,4-Dihydroxybenzoic acid, a metabolin of DA, F(3, 20)=1.786, P=0.651; HVA: 4-hydroxy-3-methoxyphenylacetic, another metabolin of DA, F(3, 20)=2.231, P=0.479; 5-HT: serotonin, F(3, 20)=2.463, P=0.341).(**C**) Q-PCR measurements of trophic factors level in the MeA region from control and socially isolated male and female mice (n =6 mice/group; two-way ANOVA; IGF-1: insulin-like growth factor 1, F(3, 20)=2.216, P=0.498; VEGF: vascular endothelial growth factor, F(3, 20)=2.326, P=0.455; BDNF: brain-derived neurotrophic factor, F(3, 20)=2.467, P=0.399; GDNF: glial cell line-derived neurotrophic factor, F(3, 20)=2.536, P=0.397; FGF-2: fibroblast growth factor 2, F(3, 20)=2.687, P=0.365).(**D**) Two-week social Isolation from P21 did not change Tac2 mRNA levels in the medial prefrontal cortex (mPFC), hippocampus (Hip.), nucleus accumbens (NAc), ventral tegmental area (VTA) and dorsal raphe nucleus (DRN) region (n = 6 mice/group; two-way ANOVA; mPFC: F(3, 20)=2.235, P=0.468; Hip.: F(3, 20)=2.512, P=0.465; NAc: F(3, 20)=2.098, P=0.576; VTA: F(3, 20)=2.623, P=0.414; DRN: F(3, 20)=2.578, P=0.473). Data were presented as mean ± s.e.m.


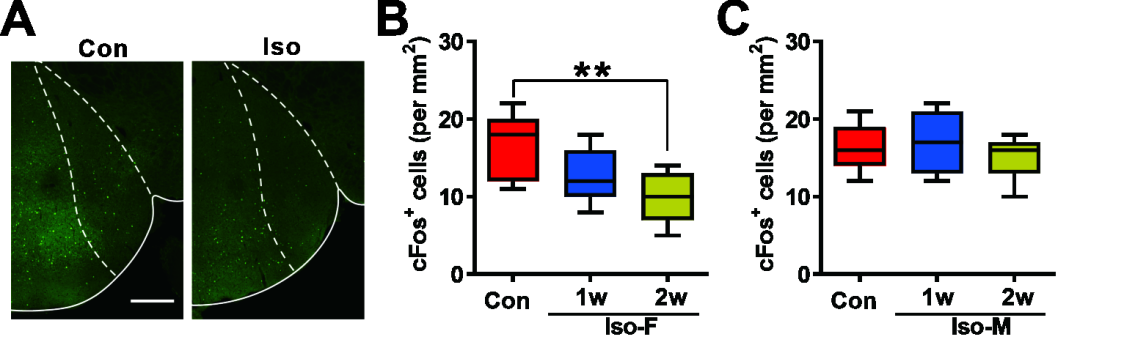


**Fig.S9. Two-week social isolation induced a decrease in the number of cFos+ cells in the MeA among female mice. (A, B)** Two-week social isolation decreased neural activity in the MeA, shown by a decreased c-fos+ neuron number measured by immunofluorescent staining (A) and quantitative analysis (B, n = 8 slices from 4 mice/group; one-way ANOVA; F(2, 21)=3.47, P=0.044). Scale bar: 100 µm. (**C**) Two-week social isolation did not affect the number of cFos+ cells in the MeA among male mice (n = 8 slices from 4 mice/group; one-way ANOVA; F(2, 21)=1.37, P=0.317). Data were presented as mean ± s.e.m; **, P < 0.01.


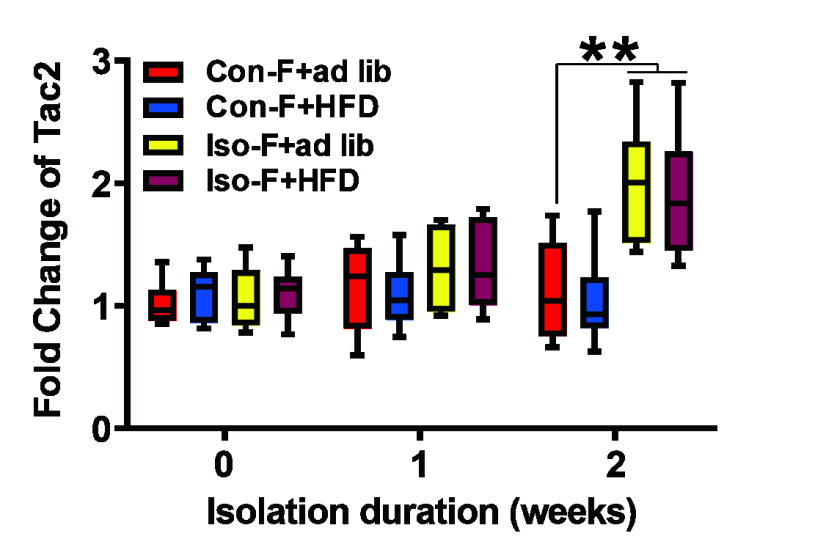


**Fig.S10. HFD did not lead to the reduction in Tac2 in female mice** (n= 8 mice/group; two-way ANOVA; for 0, F(3, 28)=1.684, P=0.402; for 1, F(3, 28)=3.087, P=0.214; for 2, F(3, 28)=5.254, P=0.036). Data were presented as mean ± s.e.m; **, P < 0.01.


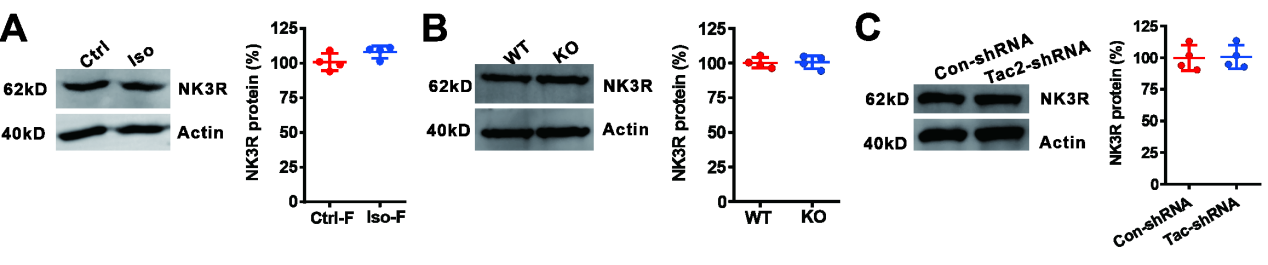


**Fig.S11. Western blotting results of NK3R.** (**A**) Two-week social isolation did not affect the protein level of Nk3R, a receptor of Tac2, in the MeA of female mice (n = 4 experiments/group; two tailed Student’s t test, P = 0.627). (**B**) Knockout of the Tac2 did not affect the protein level of Nk3R in the MeA of female mice (n = 4 experiments/group; two tailed Student’s t test, P = 0.724). (**C**) Knockdown of the Tac2 in the MeA did not affect the protein level of Nk3R in the MeA of female mice (n = 4 experiments/group; two tailed Student’s t test, P = 0.427). Data were presented as mean ± s.e.m.


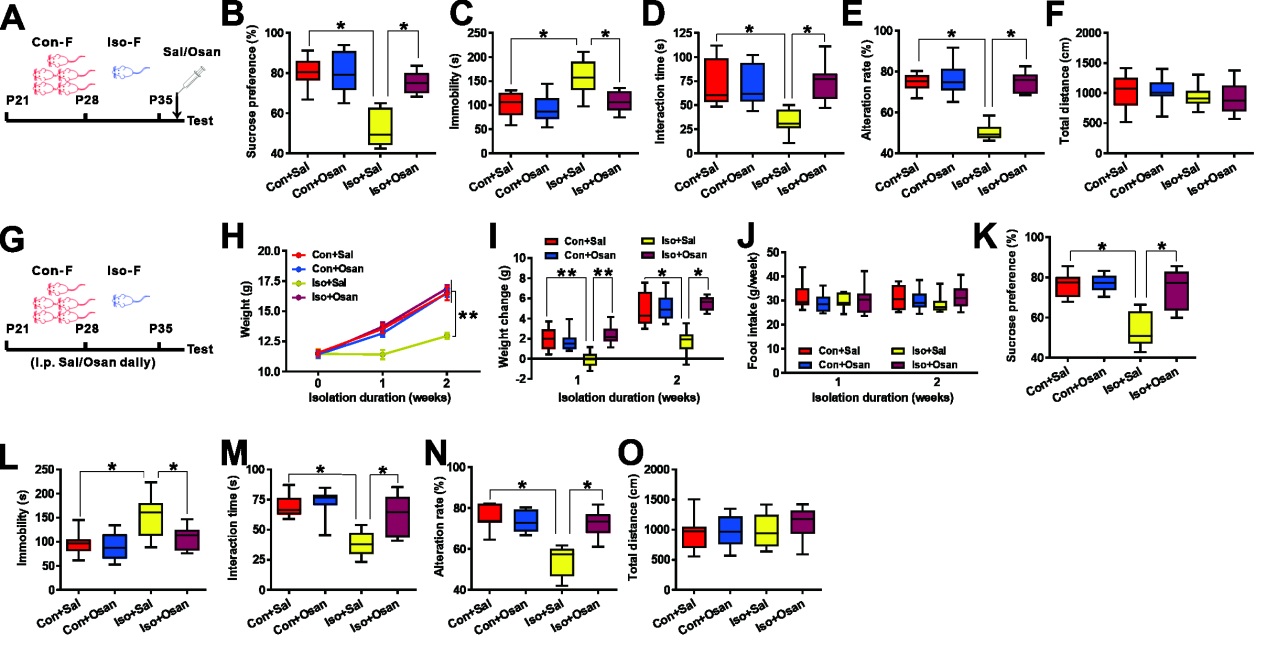


**Fig.S12. Systemic Nk3R antagonism attenuates social isolation-induced changes in female mice.** (**A-F**) Intraperitoneal injection of osanetant blocked social isolation-induced depressive-like behaviors (n=10 mice/group; two-way ANOVA; for B: F(3, 36)=4.602, P=0.047; for C: F(3, 36)=4.201, P=0.048; for D: F(3, 36)=4.784, P=0.045; for E: F(3, 36)=5.103, P=0.041; for F: F(3, 36)=2.713, P=0.374). (**G-O**) Osanetant administered daily during social isolation prevented the slower weight gain (H-J, n=10 mice/group; repeated measures two-way ANOVA; for H: F(3, 108)=12.563, P=0.041; for I: F(3, 72)=11.634, P=0.034; for J: F(3, 72)=3.563, P=0.728) and depressive-like behaviors (K-O, n=10 mice/group; two-way ANOVA; for K: F(3, 36)=4.645, P=0.046; for L: F(3, 36)=4.735, P=0.045; for M: F(3, 36)=5.324, P=0.042; for N: F(3, 36)=5.568, P=0.036; for O: F(3, 36)=2.954, P=0.389) in isolated female mice. Data were presented as mean ± s.e.m; *, p < 0.05,**, P<0.01.
